# Supplementary material for: Sensor-independent LAI/FPAR CDR: reconstructing a global sensor-independent climate data record of MODIS and VIIRS LAI/FPAR from 2000 to 2022
Source: Copernicus journal article supplement (doi:10.5194/essd-16-15-2024), 2024-01-04
Supplement: Supplementary file 1 [file essd-16-15-2024-supplement.pdf]

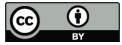

*Supplement of*

**Sensor-independent LAI/FPAR CDR: reconstructing a global sensor-independent climate data record of MODIS and VIIRS LAI/FPAR from 2000 to 2022**

**Jiabin Pu et al.**

*Correspondence to:* Kai Yan (kaiyan@bnu.edu.cn)

The copyright of individual parts of the supplement might differ from the article licence.

Supplementary.

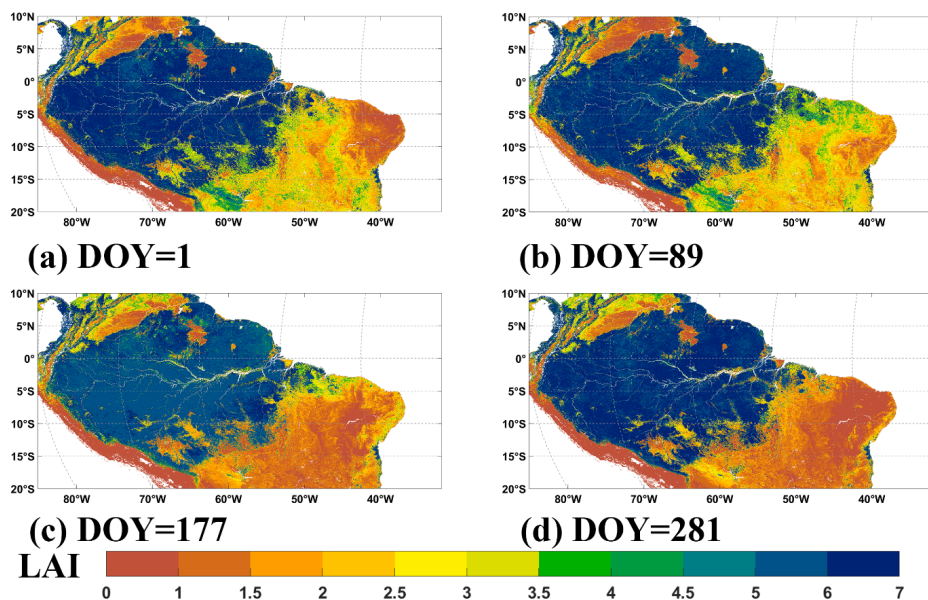

Figure S1. The spatial performance of the LAI reference for DOY 1 (a), 89 (b), 177 (c), 281 (d) in the Amazon Forest region.

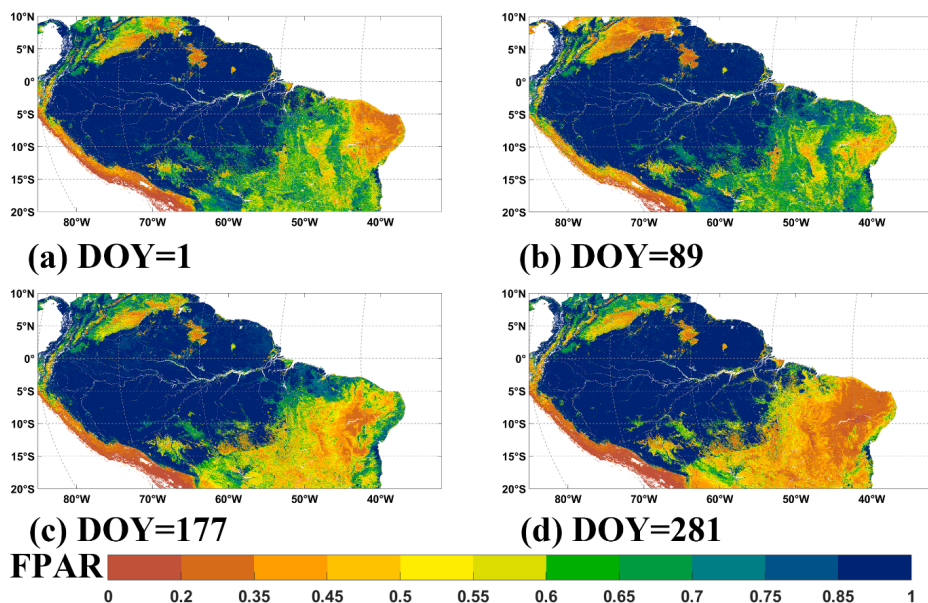

5 Figure S2. Same as Fig. S1 but for FPAR. The spatial performance of the FPAR reference for DOY 1 (a), 89 (b), 177 (c), 281 (d) in the Amazon Forest region.

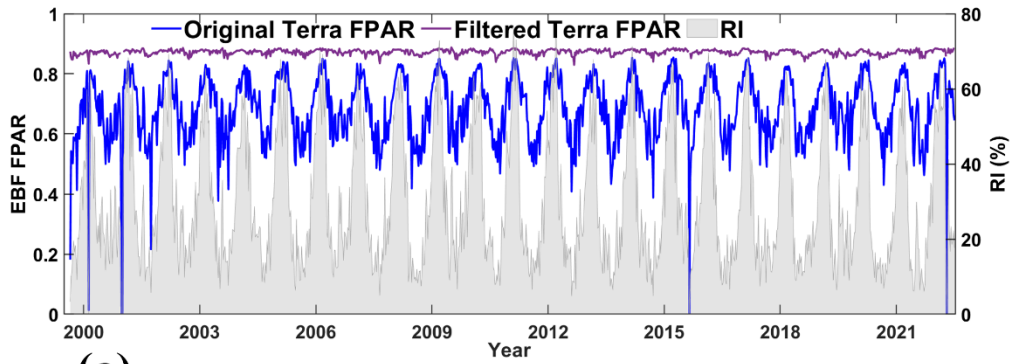

(a)

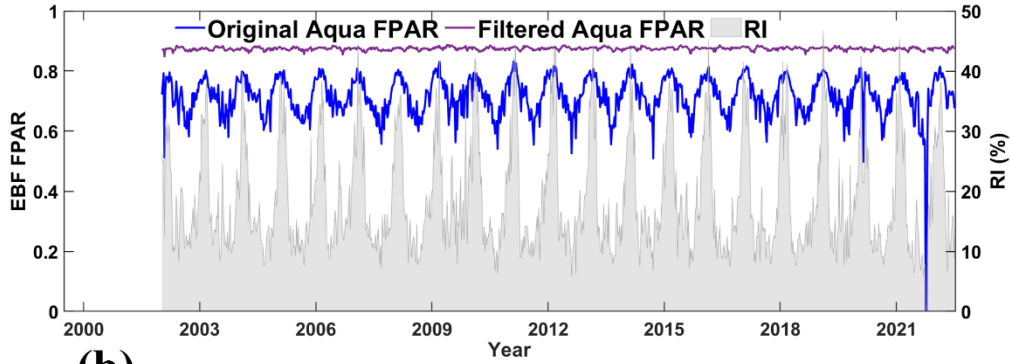

(b)

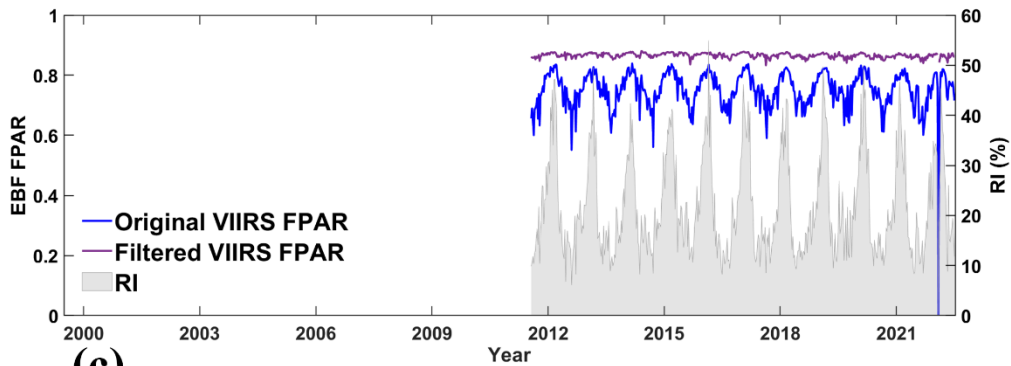

(c)

10 **Figure S3.** Same as Fig. 3 but for FPAR. The temporal comparisons between the original Terra/Aqua/VIIRS FPAR and Filtered Terra/Aqua/VIIRS FPAR for the EBF of Amazon Forest region.

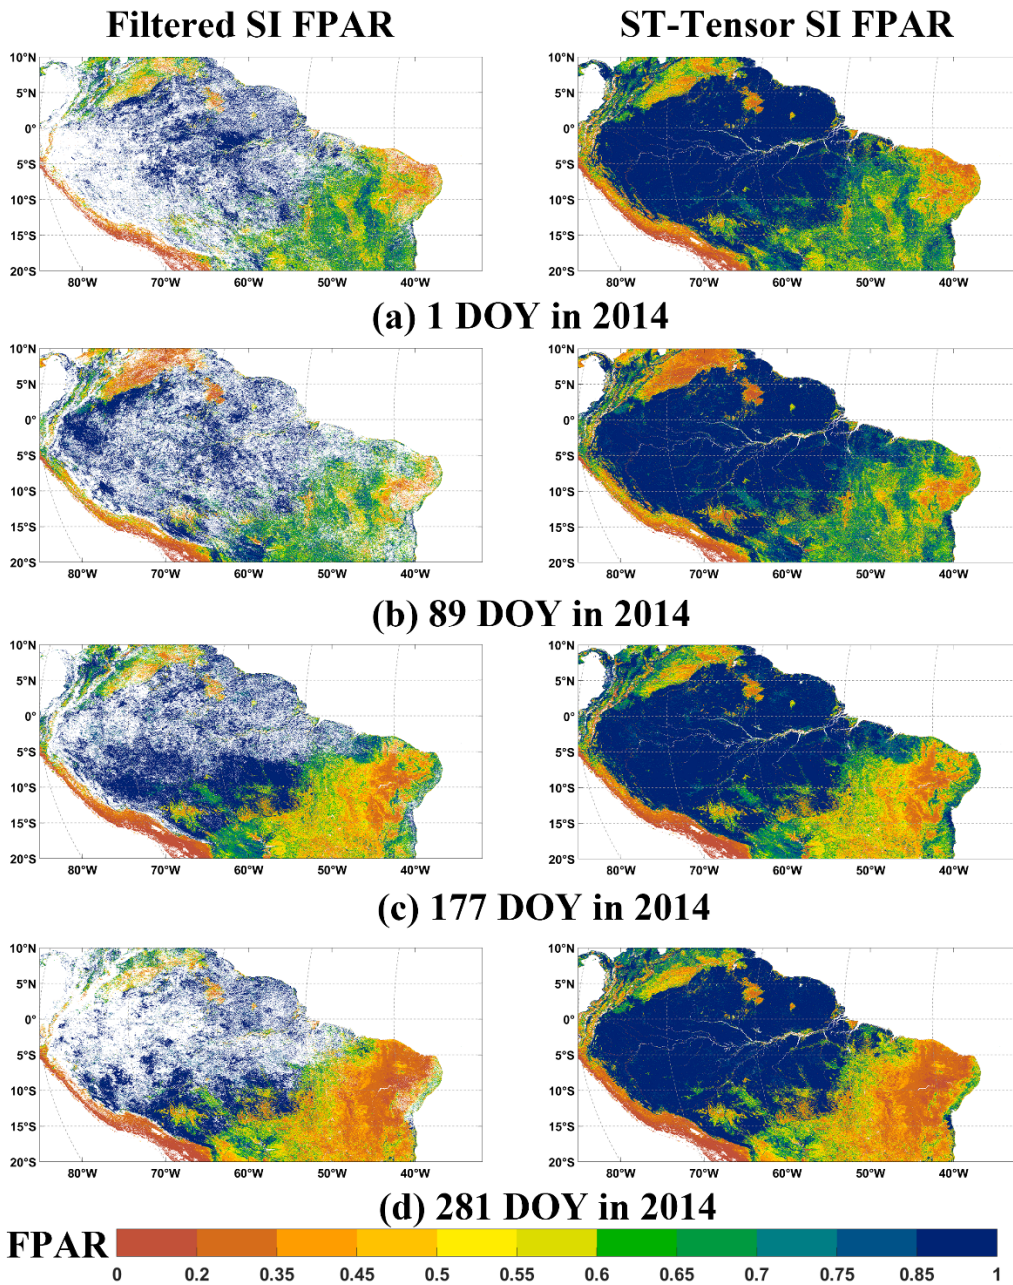

**Figure S4.** Same as Fig. 6 but for FPAR. The spatial performance of the ST-Tensor method for DOY 1 (a), 89 (b), 177 (c), 281 (d) in 2014 year in the Amazon Forest region.



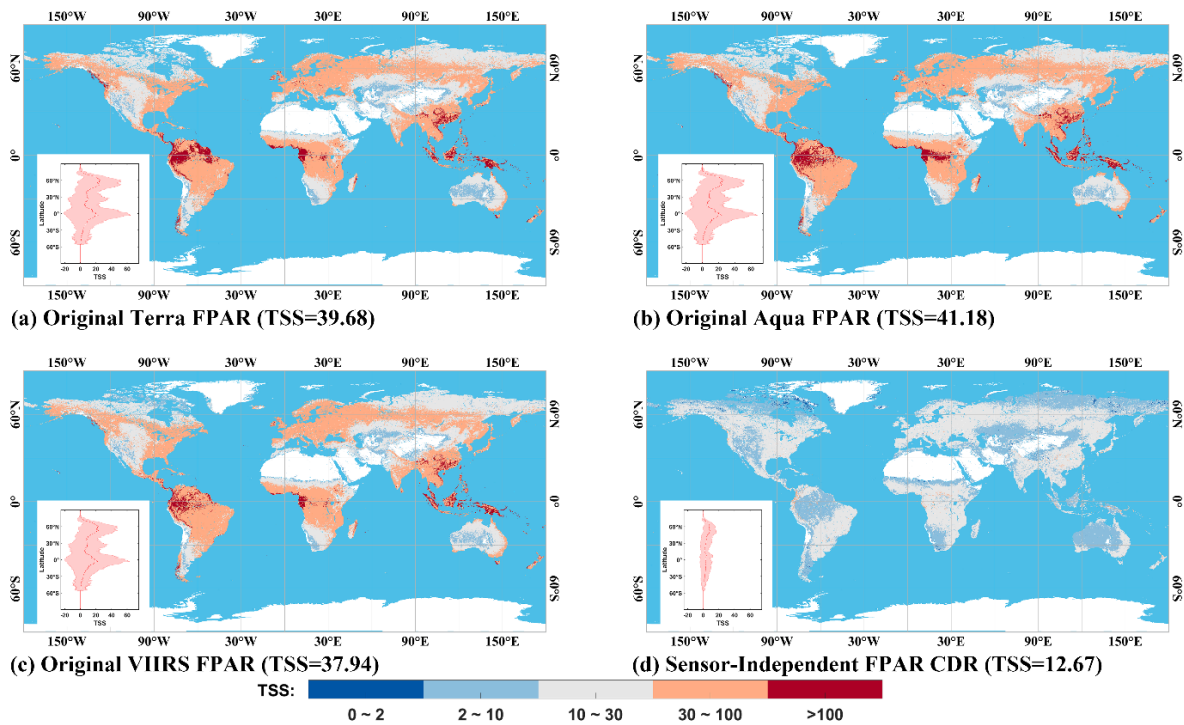

15 **Figure S5.** Same as Fig. 7 but for FPAR. The global distribution of FPAR TSS in each 0.05 degree $\times$  0.05 degree grid from 2013 to 2022.

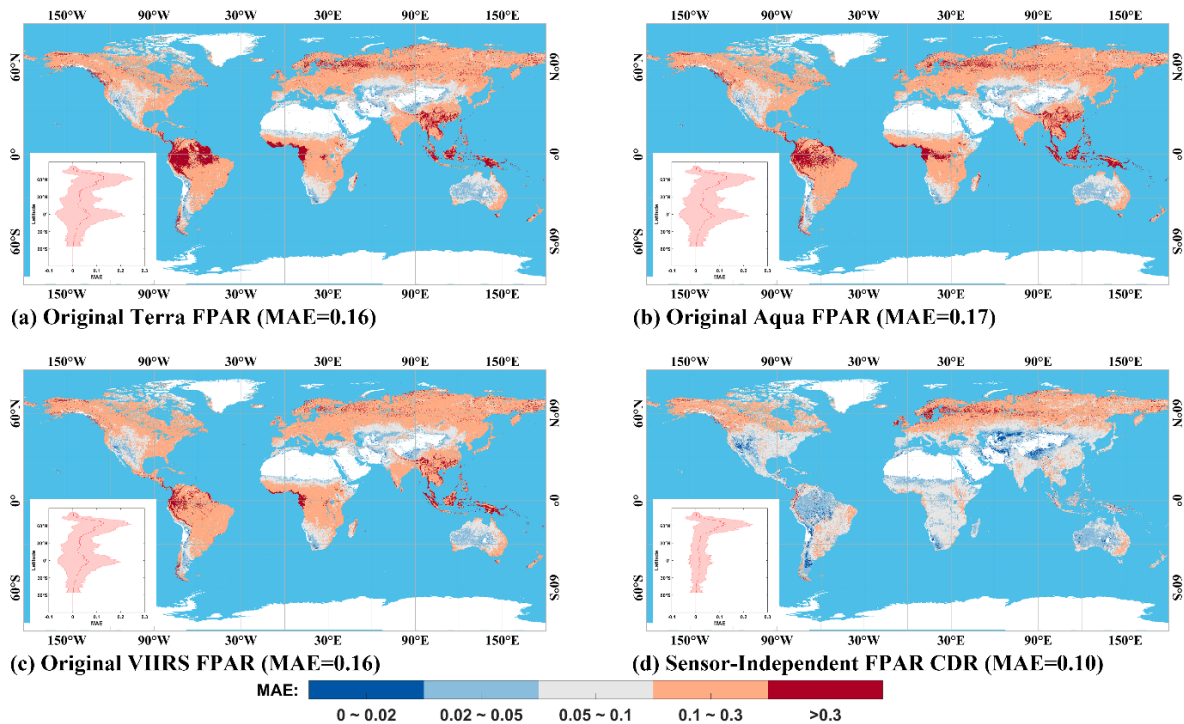

**Figure S6.** Same as Fig. 8 but for FPAR. The global distribution of FPAR MAE in each 0.05 degree $\times$  0.05 degree grid from 2013 to 2022.

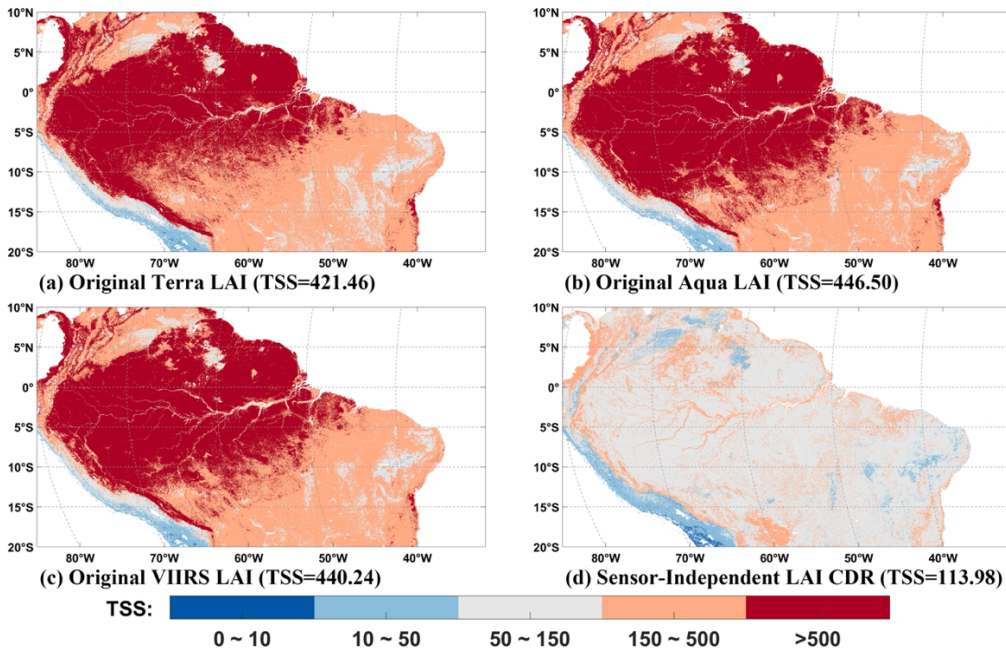

**Figure S7.** Same as Fig. 7 but for the Amazon Forest region. The spatial distribution of LAI TSS in each  $500\text{m} \times 500\text{m}$  grid, with sinusoidal projection over the selected Amazon Forest region (zoom-in case in Fig. 1), from 2013 to 2022.

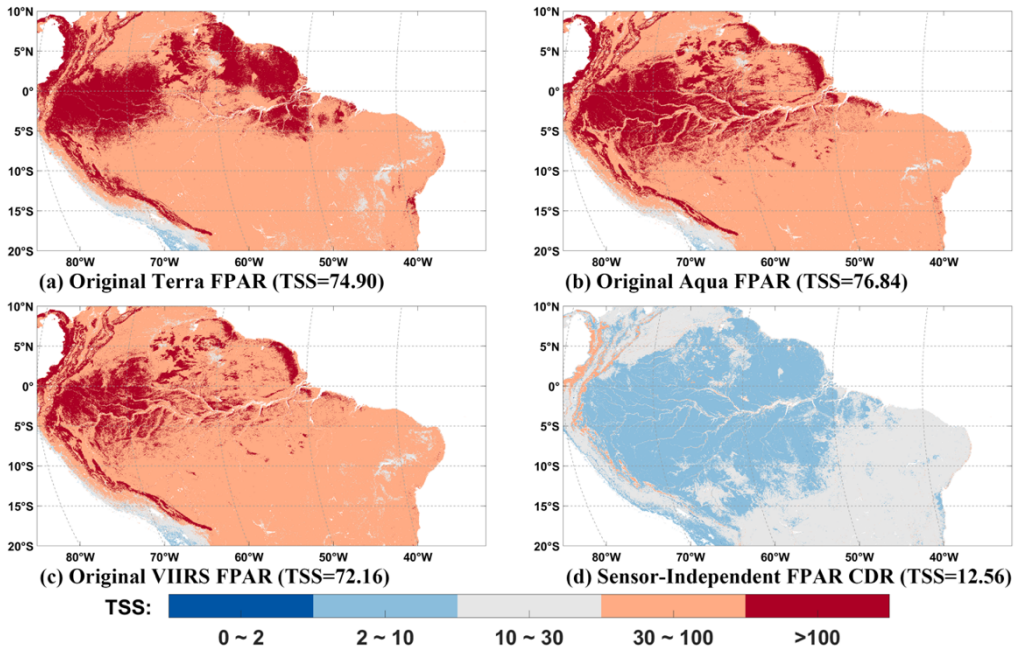

**Figure S8.** Same as Fig. S7 but for FPAR. The spatial distribution of FPAR TSS in each  $500\text{m} \times 500\text{m}$  grid, with sinusoidal projection over the selected Amazon Forest region (zoom-in case in Fig. 1), from 2013 to 2022.

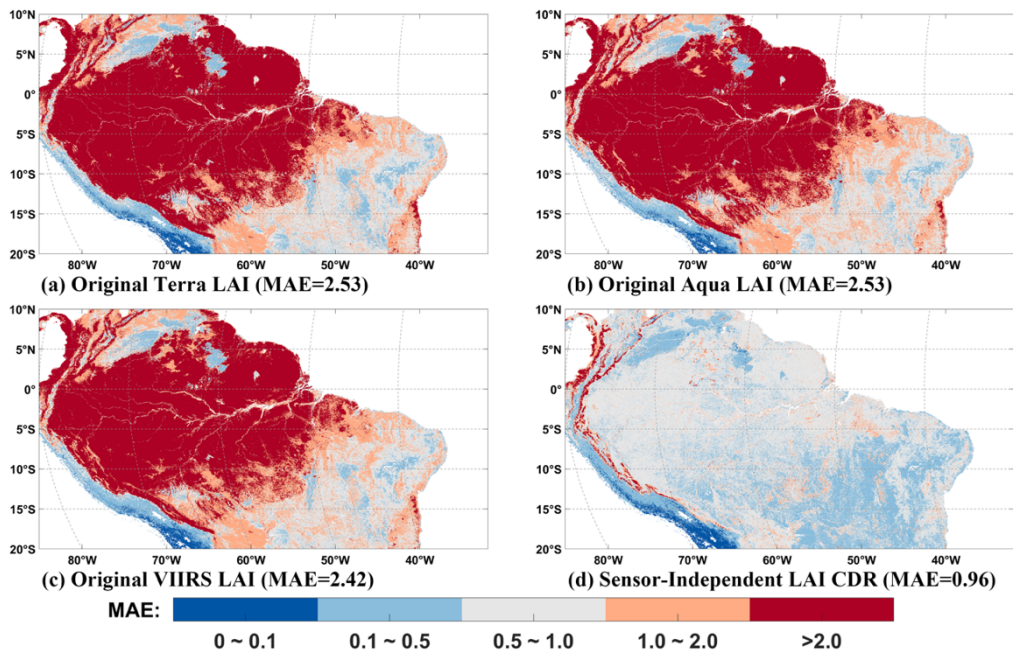

25 **Figure S9.** Same as Fig. S7 but the metric is MAE. The spatial distribution of LAI MAE in each  $500\text{m} \times 500\text{m}$  grid, with sinusoidal projection over the selected Amazon Forest region (zoom-in case in Fig. 1), from 2013 to 2022.

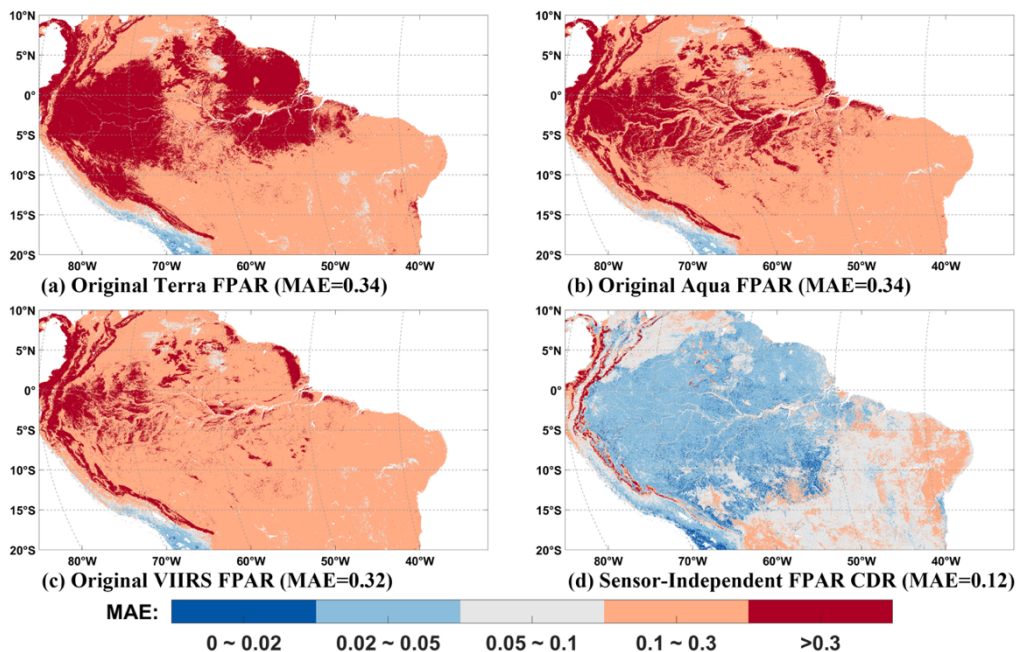

**Figure S10.** Same as Fig. S9 but for FPAR. The spatial distribution of FPAR MAE in each  $500\text{m} \times 500\text{m}$  grid, with sinusoidal projection over the selected Amazon Forest region (zoom-in case in Fig. 1), from 2013 to 2022.



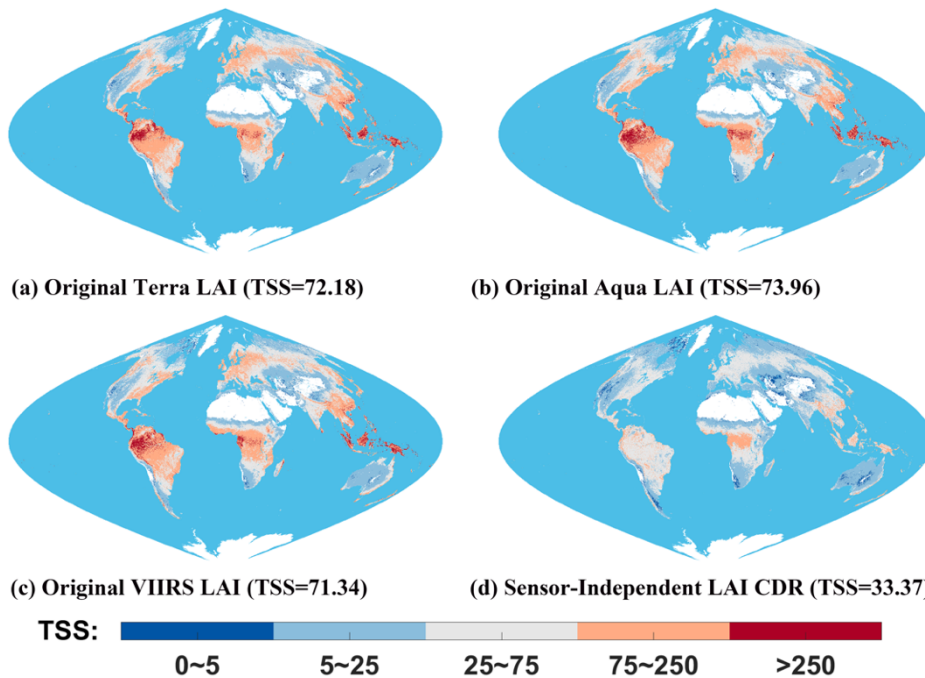

30

**Figure S11.** Same as Fig. S7 and the spatial resolution is 5km and the temporal resolution is bimonthly. The global distribution of LAI TSS in each 5km× 5km grid, with sinusoidal projection, from 2013 to 2022.

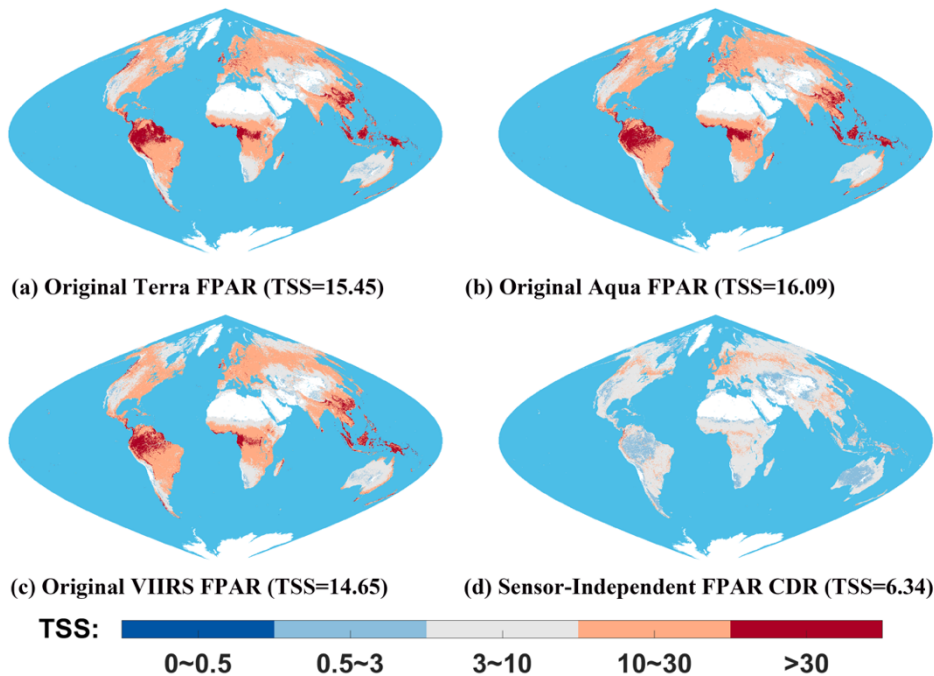

35

**Figure S12.** Same as Fig. S11 but for FPAR. The global distribution of FPAR TSS in each 5km× 5km grid, with sinusoidal projection, from 2013 to 2022.



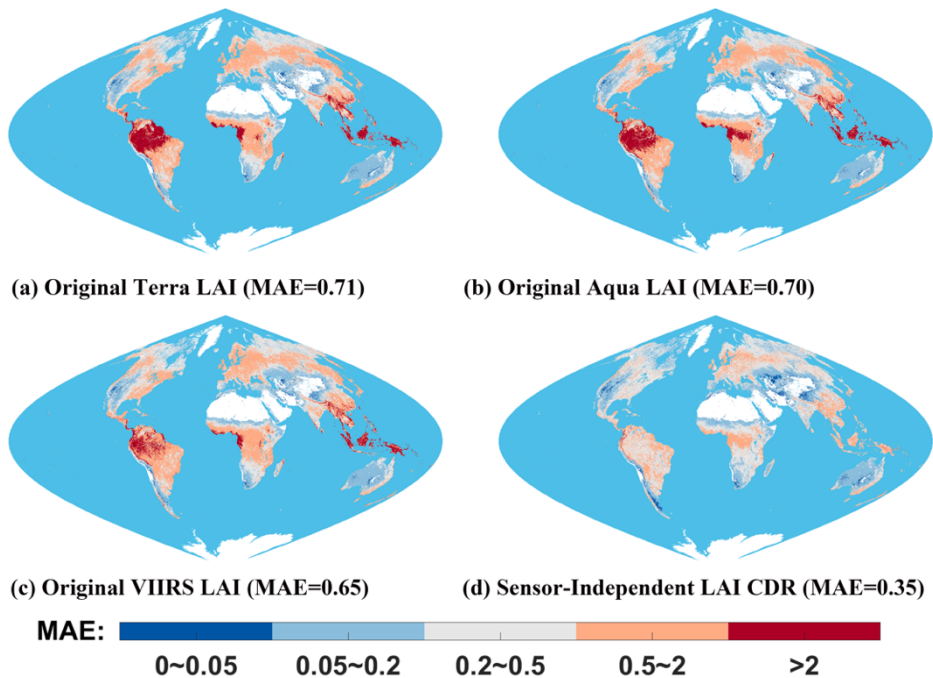

**Figure S13.** Same as Fig. S11 but the metric is MAE. The global distribution of LAI MAE in each 5km× 5km grid, with sinusoidal projection, from 2013 to 2022.

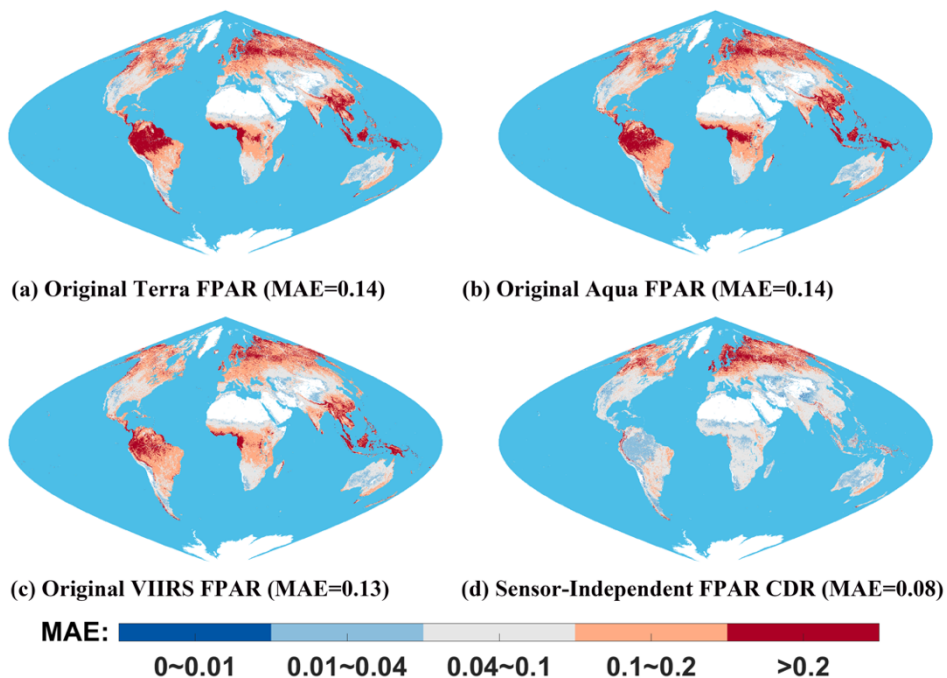

40 **Figure S14.** Same as Fig. S13 but for FPAR. The global distribution of FPAR MAE in each 5km× 5km grid, with sinusoidal projection, from 2013 to 2022.

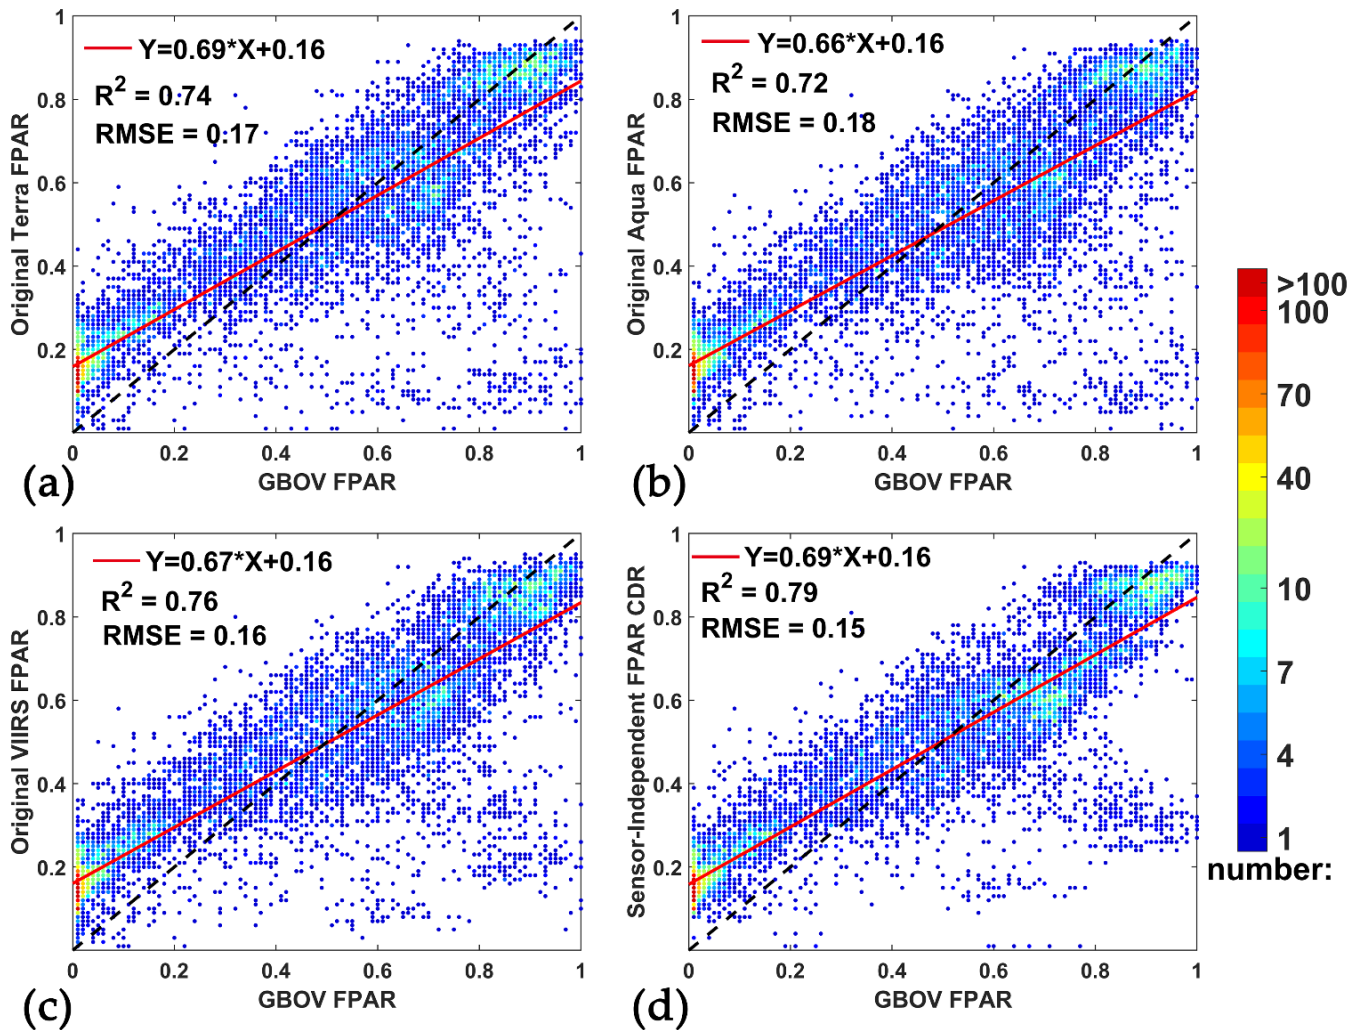

**Figure S15.** Same as Fig. 9 but for FPAR. Comparisons of original Terra/Aqua/VIIRS FPAR and SI FPAR CDR with ground GBOV FPAR.

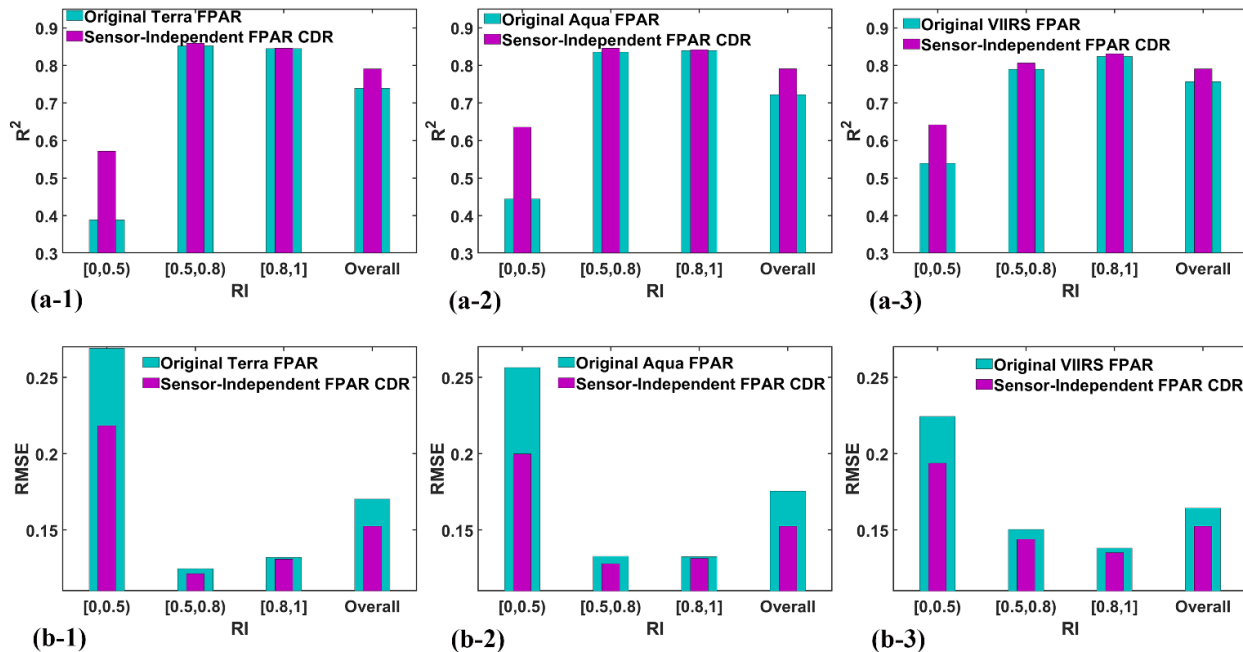

45 **Figure S16.** Same as Fig. 10 but for FPAR. The  $R^2$  and RMSE between original Terra/Aqua/VIIRS FPAR and SI FPAR CDR and GBOV FPAR in different RI ranges.

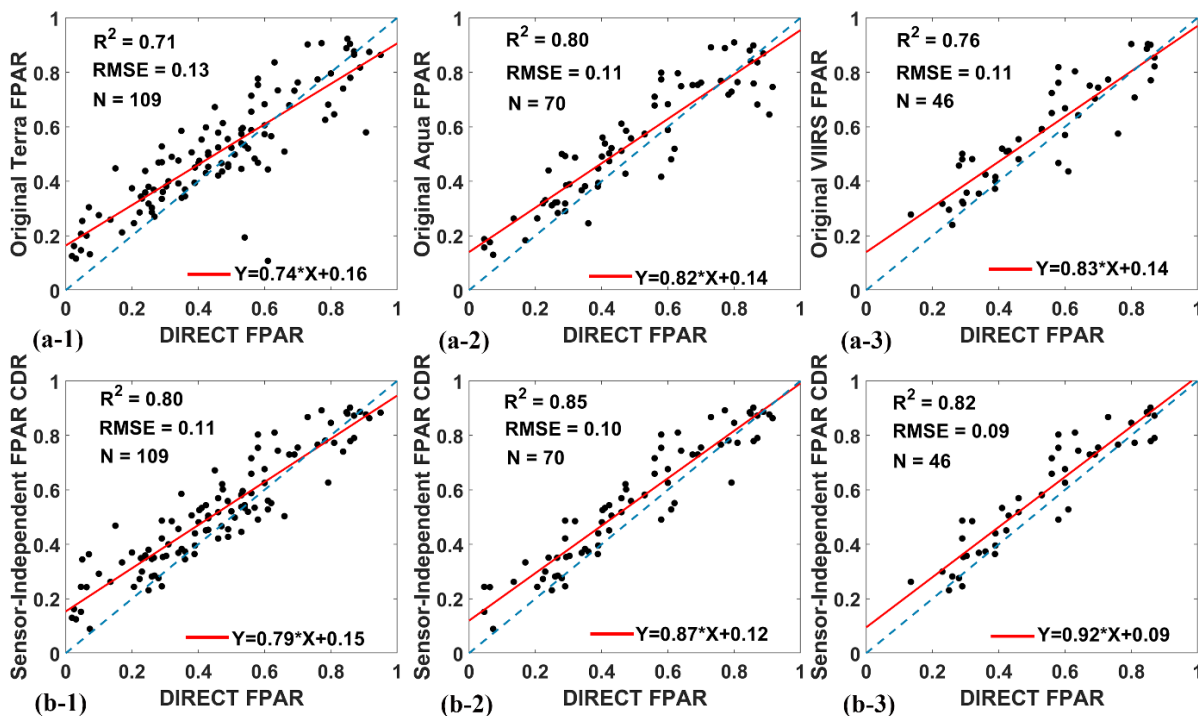

**Figure S17.** Same as Fig. 11 but for FPAR. Comparisons of original Terra/Aqua/VIIRS FPAR and SI FPAR CDR with ground DIRECT2.1 FPAR measurements.
